# Supplementary material for: In Vitro & In Vivo Studies on Identifying and Designing Temporin-1CEh from the Skin Secretion of Rana chensinensis as the Optimised Antibacterial Prototype Drug
Source: MDPI journal article supplement (doi:10.3390/pharmaceutics14030604), 2022-03-10
Supplement: s1 [file s1]

## Supplementary Materials

### *In Vitro & In Vivo* studies on Identifying and Designing Temporin-1CEh from the Skin Secretion of *Rana chensinensis* as the Optimized Antibacterial Prototype Drug

**Table S1.** Two-way ANOVA analysis of permeability of Temporin-1CEh and its analogues against *S. aureus*. The significance was presented by the symbol ns (non-significant difference), \*\* (P<0.01) and \*\*\*\* (P<0.0001).

| Tukey's multiple comparisons test |                                |            |                    |         |                  |
|-----------------------------------|--------------------------------|------------|--------------------|---------|------------------|
| Peptide concentration (μM)        | Peptide name                   | Mean Diff. | 95.00% CI of diff. | Summary | Adjusted P Value |
| 4                                 | Temporin-1CEh vs. T1CEh-KKPW   | -5         | -11.90 to 1.898    | ns      | 0.2269           |
|                                   | Temporin-1CEh vs. T1CEh-KKPWW  | -4.333     | -11.23 to 2.564    | ns      | 0.3454           |
|                                   | Temporin-1CEh vs. T1CEh-KKPWW2 | -60        | -66.90 to -53.10   | ****    | <0.0001          |
|                                   | T1CEh-KKPW vs. T1CEh-KKPWW     | 0.6667     | -6.231 to 7.564    | ns      | 0.9938           |
|                                   | T1CEh-KKPW vs. T1CEh-KKPWW2    | -55        | -61.90 to -48.10   | ****    | <0.0001          |
|                                   | T1CEh-KKPWW vs. T1CEh-KKPWW2   | -55.67     | -62.56 to -48.77   | ****    | <0.0001          |
| 8                                 | Temporin-1CEh vs. T1CEh-KKPW   | 57         | 50.10 to 63.90     | ****    | <0.0001          |
|                                   | Temporin-1CEh vs. T1CEh-KKPWW  | 46.67      | 39.77 to 53.56     | ****    | <0.0001          |
|                                   | Temporin-1CEh vs. T1CEh-KKPWW2 | -32.67     | -39.56 to -25.77   | ****    | <0.0001          |
|                                   | T1CEh-KKPW vs. T1CEh-KKPWW     | -10.33     | -17.23 to -3.436   | **      | 0.0014           |
|                                   | T1CEh-KKPW vs. T1CEh-KKPWW2    | -89.67     | -96.56 to -82.77   | ****    | <0.0001          |
|                                   | T1CEh-KKPWW vs. T1CEh-KKPWW2   | -79.33     | -86.23 to -72.44   | ****    | <0.0001          |
| 16                                | Temporin-1CEh vs. T1CEh-KKPW   | 92.67      | 85.77 to 99.56     | ****    | <0.0001          |
|                                   | Temporin-1CEh vs. T1CEh-KKPWW  | 56         | 49.10 to 62.90     | ****    | <0.0001          |
|                                   | Temporin-1CEh vs. T1CEh-KKPWW2 | 14.67      | 7.769 to 21.56     | ****    | <0.0001          |
|                                   | T1CEh-KKPW vs. T1CEh-KKPWW     | -36.67     | -43.56 to -29.77   | ****    | <0.0001          |

|    |                                |        |                  |      |         |
|----|--------------------------------|--------|------------------|------|---------|
|    | T1CEh-KKPW vs. T1CEh-KKPWW2    | -78    | -84.90 to -71.10 | **** | <0.0001 |
|    | T1CEh-KKPWW vs. T1CEh-KKPWW2   | -41.33 | -48.23 to -34.44 | **** | <0.0001 |
| 32 | Temporin-1CEh vs. T1CEh-KKPW   | 90.67  | 83.77 to 97.56   | **** | <0.0001 |
|    | Temporin-1CEh vs. T1CEh-KKPWW  | 29     | 22.10 to 35.90   | **** | <0.0001 |
|    | Temporin-1CEh vs. T1CEh-KKPWW2 | 66.33  | 59.44 to 73.23   | **** | <0.0001 |
|    | T1CEh-KKPW vs. T1CEh-KKPWW     | -61.67 | -68.56 to -54.77 | **** | <0.0001 |
|    | T1CEh-KKPW vs. T1CEh-KKPWW2    | -24.33 | -31.23 to -17.44 | **** | <0.0001 |
|    | T1CEh-KKPWW vs. T1CEh-KKPWW2   | 37.33  | 30.44 to 44.23   | **** | <0.0001 |
| 64 | Temporin-1CEh vs. T1CEh-KKPW   | 78.67  | 71.77 to 85.56   | **** | <0.0001 |
|    | Temporin-1CEh vs. T1CEh-KKPWW  | 20     | 13.10 to 26.90   | **** | <0.0001 |
|    | Temporin-1CEh vs. T1CEh-KKPWW2 | 80     | 73.10 to 86.90   | **** | <0.0001 |
|    | T1CEh-KKPW vs. T1CEh-KKPWW     | -58.67 | -65.56 to -51.77 | **** | <0.0001 |
|    | T1CEh-KKPW vs. T1CEh-KKPWW2    | 1.333  | -5.564 to 8.231  | ns   | 0.9543  |
|    | T1CEh-KKPWW vs. T1CEh-KKPWW2   | 60     | 53.10 to 66.90   | **** | <0.0001 |

**Table S2.** Two-way ANOVA analysis of permeability of Temporin-1CEh and its analogues against *E. coli*. The significance was presented by the symbol ns (non-significant difference), \*\* (P<0.01) and \*\*\*\* (P<0.0001).

| Tukey's multiple comparisons test |                                |            |                    |         |                  |
|-----------------------------------|--------------------------------|------------|--------------------|---------|------------------|
| Peptide concentration (μM)        | Peptide name                   | Mean Diff. | 95.00% CI of diff. | Summary | Adjusted P Value |
| 4                                 | Temporin-1CEh vs. T1CEh-KKPW   | 1.333      | -4.825 to 7.491    | ns      | 0.9374           |
|                                   | Temporin-1CEh vs. T1CEh-KKPWW  | -0.3333    | -6.491 to 5.825    | ns      | 0.9989           |
|                                   | Temporin-1CEh vs. T1CEh-KKPWW2 | -69.67     | -75.82 to -63.51   | ****    | <0.0001          |
|                                   | T1CEh-KKPW vs. T1CEh-KKPWW     | -1.667     | -7.825 to 4.491    | ns      | 0.8863           |
|                                   | T1CEh-KKPW vs. T1CEh-KKPWW2    | -71        | -77.16 to -64.84   | ****    | <0.0001          |
|                                   | T1CEh-KKPWW vs. T1CEh-KKPWW2   | -69.33     | -75.49 to -63.18   | ****    | <0.0001          |
| 8                                 | Temporin-1CEh vs. T1CEh-KKPW   | 38.33      | 32.18 to 44.49     | ****    | <0.0001          |

|    |                                |        |                  |      |         |
|----|--------------------------------|--------|------------------|------|---------|
|    | Temporin-1CEh vs. T1CEh-KKPWW  | 33     | 26.84 to 39.16   | **** | <0.0001 |
|    | Temporin-1CEh vs. T1CEh-KKPWW2 | -36.33 | -42.49 to -30.18 | **** | <0.0001 |
|    | T1CEh-KKPW vs. T1CEh-KKPWW     | -5.333 | -11.49 to 0.8245 | ns   | 0.1101  |
|    | T1CEh-KKPW vs. T1CEh-KKPWW2    | -74.67 | -80.82 to -68.51 | **** | <0.0001 |
|    | T1CEh-KKPWW vs. T1CEh-KKPWW2   | -69.33 | -75.49 to -63.18 | **** | <0.0001 |
| 16 | Temporin-1CEh vs. T1CEh-KKPW   | 39.33  | 33.18 to 45.49   | **** | <0.0001 |
|    | Temporin-1CEh vs. T1CEh-KKPWW  | 1      | -5.158 to 7.158  | ns   | 0.972   |
|    | Temporin-1CEh vs. T1CEh-KKPWW2 | -29    | -35.16 to -22.84 | **** | <0.0001 |
|    | T1CEh-KKPW vs. T1CEh-KKPWW     | -38.33 | -44.49 to -32.18 | **** | <0.0001 |
|    | T1CEh-KKPW vs. T1CEh-KKPWW2    | -68.33 | -74.49 to -62.18 | **** | <0.0001 |
|    | T1CEh-KKPWW vs. T1CEh-KKPWW2   | -30    | -36.16 to -23.84 | **** | <0.0001 |
| 32 | Temporin-1CEh vs. T1CEh-KKPW   | 21     | 14.84 to 27.16   | **** | <0.0001 |
|    | Temporin-1CEh vs. T1CEh-KKPWW  | -20.33 | -26.49 to -14.18 | **** | <0.0001 |
|    | Temporin-1CEh vs. T1CEh-KKPWW2 | -54    | -60.16 to -47.84 | **** | <0.0001 |
|    | T1CEh-KKPW vs. T1CEh-KKPWW     | -41.33 | -47.49 to -35.18 | **** | <0.0001 |
|    | T1CEh-KKPW vs. T1CEh-KKPWW2    | -75    | -81.16 to -68.84 | **** | <0.0001 |
|    | T1CEh-KKPWW vs. T1CEh-KKPWW2   | -33.67 | -39.82 to -27.51 | **** | <0.0001 |
| 64 | Temporin-1CEh vs. T1CEh-KKPW   | 0      | -6.158 to 6.158  | ns   | >0.9999 |
|    | Temporin-1CEh vs. T1CEh-KKPWW  | -7.667 | -13.82 to -1.509 | **   | 0.0095  |
|    | Temporin-1CEh vs. T1CEh-KKPWW2 | 28     | 21.84 to 34.16   | **** | <0.0001 |
|    | T1CEh-KKPW vs. T1CEh-KKPWW     | -7.667 | -13.82 to -1.509 | **   | 0.0095  |
|    | T1CEh-KKPW vs. T1CEh-KKPWW2    | 28     | 21.84 to 34.16   | **** | <0.0001 |
|    | T1CEh-KKPWW vs. T1CEh-KKPWW2   | 35.67  | 29.51 to 41.82   | **** | <0.0001 |
